# Supplementary material for: Understanding the Complex Patterns Observed during Hepatitis B Virus Therapy
Source: MDPI journal article supplement (doi:10.3390/v9050117), 2017-05-19
Supplement: s1 [file s1]

# Understanding the complex patterns observed during hepatitis B Virus therapy - Supplementary material

Andrea Carracedo Rodriguez\*, Matthias Chung\*, Stanca M Ciupe\*,<sup>¶</sup>  
April 21, 2017

**Positivity and boundness.** We first establish the positivity and boundness of model

$$\begin{aligned}\frac{dT}{dt} &= r_T T \left(1 - \frac{T+I}{K}\right) - \beta(1-\eta)VT, \\ \frac{dI}{dt} &= r_I I \left(1 - \frac{T+I}{K}\right) + \beta(1-\eta)VT - \delta I, \\ \frac{dV}{dt} &= (1-\epsilon)pI - cV.\end{aligned}\tag{1}$$

subject to initial conditions

$$T(0) = T_0 > 0, \quad I(0) = I_0 > 0, \quad V(0) = V_0 > 0, \quad T(0) + I(0) \leq K.\tag{2}$$

**Proposition 1.** *The solutions of (1) subject to (2) are positive on  $[0, b)$  for some  $b > 0$ .*

*Proof.* Note that (1) is locally Lipschitz at  $t = 0$ . Therefore, a solution exists and is unique on  $[0, b)$  for some  $b > 0$ . Assume that there exists  $t_1 \in (0, b)$  such that  $V(t_1) = 0$  and all variables are positive on  $[0, t_1]$ . For all  $t \in [0, t_1]$

$$\frac{dV}{dt} = (1-\epsilon)pI - cV \geq -cV,$$

and so

$$V(t_1) \geq V_0 e^{-ct_1} > 0,$$

a contradiction. Therefore  $V(t) > 0$  for all  $t \in [0, t_1]$ . □

**Proposition 2.** *If  $\max\{r_T, r_I\} > \min\{d_T, \delta\}$ , then any solution  $(T(t), I(t))$  of (1) subject to (2) remains bounded on  $[0, b)$  for some  $b > 0$ .*

*Proof.* Let  $F = T + I$ ,  $r_{\max} = \max\{r_T, r_I\}$  and  $d_{\min} = \min\{d_T, \delta\}$ . Then

$$\begin{aligned}\frac{dF}{dt} &\leq s + r_{\max} F \left(1 - \frac{F}{K}\right) - d_{\min} F \\ &= s + (r_{\max} - d_{\min})F - \frac{r_{\max}}{K} F^2 \\ &= -\frac{r_{\max}}{K} (F - X)(F - Y),\end{aligned}$$

where

---

<sup>¶</sup>Corresponding author

$$X = \frac{r_{\max} - d_{\min} + \sqrt{(r_{\max} - d_{\min})^2 + \frac{4sr_{\max}}{K}}}{-2s},$$

$$Y = \frac{r_{\max} - d_{\min} - \sqrt{(r_{\max} - d_{\min})^2 + \frac{4sr_{\max}}{K}}}{-2s}.$$

Then

$$\int \frac{dF}{(F-X)(F-Y)} \leq \int -\frac{r_{\max}}{K} dt$$

$$\frac{1}{X-Y} \ln |F-X| + \frac{1}{Y-X} \ln |F-Y| \leq -\frac{r_{\max}}{K} t$$

$$\left| \frac{F-X}{F-Y} \right| \leq \exp \left( -\frac{(X-Y)r_{\max}}{K} t \right).$$

and, since  $r_{\max} > d_{\min}$ ,

$$F(t) \leq \frac{X - Y \exp \left( -\frac{(X-Y)r_{\max}}{K} t \right)}{1 - \exp \left( -\frac{(X-Y)r_{\max}}{K} t \right)}.$$

Note that  $X - Y > 0$ , and so  $F(t)$  is bounded. Therefore  $T(t)$  and  $I(t)$  are bounded.  $\square$

**Proposition 3.** *Any solution  $(T(t), I(t))$  of (1) subject to (2) is positive on  $[0, b)$  for some  $b > 0$ .*

*Proof.* We first show positivity for  $F$ . Assume that there exists  $t_1 \in (0, b)$  such that  $F(t_1) = 0$  and all variables are positive on  $[0, t_1)$ . Assume also that  $T$  and  $I$  are bounded on  $[0, t_1)$ , i.e., there exist  $M_1$  and  $M_2$  such that  $T(t) \leq M_1$  and  $I(t) \leq M_2$  for all  $t \in [0, t_1)$ . Then for all  $t \in [0, t_1]$

$$\begin{aligned} \frac{dF}{dt} &\geq r_{\min} F \left( 1 - \frac{F}{K} \right) - d_{\max} F \\ &\geq r_{\min} F \left( -\frac{M_1 + M_2}{K} \right) - d_{\max} F \\ &= -\tilde{c}F, \end{aligned} \quad \tilde{c} > 0$$

and so

$$F(t_1) \geq F_0 e^{-\tilde{c}t_1} > 0$$

a contradiction. Then  $F(t) > 0$  for all  $t \in [0, t_1]$ . Since we assume all the variables positive on  $[0, t_1)$ , this implies that both  $T(t)$  and  $I(t)$  are positive for all  $t \in [0, t_1]$ .  $\square$

**Proposition 4.** *If  $\max\{r_T, r_I\} > \min\{d_T, \delta\}$ , then any solution  $V(t)$  of (1) subject to (2) remains bounded on  $[0, b)$  for some  $b > 0$ .*

*Proof.* If  $I(t)$  is bounded on  $[0, b)$ , then there exists a number  $M > 0$  such that

$$M \geq (1 - \epsilon)p \sup_{t \in [0, b)} I(t).$$

Then for any  $t \in [0, b)$  we have

$$\frac{dV}{dt} = (1 - \epsilon)p - cV \leq M - cV,$$

and so

$$V(t) \leq \max \left\{ V_0, \frac{M}{c} \right\}.$$

□

**Stability analysis.** We study the local asymptotic stability of system (1)'s equilibria for  $\epsilon = \eta = 0$ . The system has four equilibria: a liver death equilibria  $E^* = (0, 0, 0)$ , a disease-free equilibrium

$$E_0 = (K, 0, 0),$$

a chronic infection equilibrium with total liver infection

$$E^{tot.liv} = \left( 0, \frac{K(r_I - \delta)}{r_I}, \frac{pK(r_I - \delta)}{cr_I} \right),$$

and a chronic equilibrium with partial liver infection

$$E = \left( \frac{c\delta(R_0(\delta - r_I) + r_T)}{\beta p(R_0\delta + r_T - r_I)}, \frac{c\delta r_T(R_0 - 1)}{\beta p(R_0\delta + r_T - r_I)}, \frac{\delta r_T(R_0 - 1)}{\beta(R_0\delta + r_T - r_I)} \right),$$

where

$$R_0 = \frac{\beta p K}{c\delta} \quad (3)$$

is the basic reproduction number, representing the number of secondary infections induced by an infected cell in a naive population.

**Proposition 5.** *The liver death equilibrium is unstable.*

*Proof.* The Jacobian matrix for the system is

$$J = \begin{pmatrix} r_T \left(1 - \frac{2T+I}{K}\right) - \beta V & -r_T \frac{T}{K} & -\beta T \\ -r_I \frac{I}{K} + \beta V & r_I \left(1 - \frac{T+2I}{K}\right) - \delta & \beta T \\ 0 & p & -c \end{pmatrix}. \quad (4)$$

When evaluated at  $E^*$ ,  $J$  becomes:

$$J = \begin{pmatrix} r_T & 0 & 0 \\ 0 & r_I - \delta & 0 \\ 0 & p & -c \end{pmatrix},$$

whose eigenvalues  $\lambda_1 = r_T > 0$  and  $\lambda_2 = r_I - \delta > 0$ . Therefore  $E^*$  is unstable.

□

**Proposition 6.** *The free disease equilibrium is locally asymptotically stable if  $R_0 < 1$ .*

*Proof.* The Jacobian matrix for the system evaluated at  $E_0$  becomes:

$$J = \begin{pmatrix} -r_T & -r_T & -\beta K \\ 0 & -\delta & \beta K \\ 0 & p & -c \end{pmatrix},$$

whose eigenvalues are negative when  $R_0 < 1$ . □

**Proposition 7.** *The equilibrium  $E^{tot.liv}$  exists when  $r_I > \delta$ , is locally asymptotically stable when*

$$R_0 \frac{r_I - \delta}{r_T} > 1,$$

*and is unstable otherwise.*

*Proof.*  $E^{tot.liv}$  exists when  $r_I > \delta$ . It can be shown that the characteristic equation for  $E^{tot.liv}$  is given by

$$\left(\lambda - \frac{r_T \delta}{r_I} + \frac{\beta p K (r_I - \delta)}{r_I c}\right)(\lambda + c)(\lambda + r_I - \delta) = 0,$$

with eigenvalue  $\lambda_1 = \frac{r_T \delta}{r_I} - \frac{\beta p K (r_I - \delta)}{r_I c} < 0$  when  $R_0 \frac{r_I - \delta}{r_T} > 1$ . Since the other two eigenvalues are always negative, this condition is enough to ensure local asymptotic stability of equilibrium  $E^{tot.liv}$ . □

**Proposition 8.** *The equilibrium  $E$  is locally asymptotically stable if  $r_I > \delta$  and*

$$1 < R_0 \text{ and } R_0 \frac{r_I - \delta}{r_T} < 1.$$

The proof is messy and it will not be presented here.

When the treatment is initiated, we assume that the chronic equilibrium  $E$  is stable, *i.e.*  $1 < R_0 < \frac{r_T}{r_I - \delta}$ . A successful combination drug therapy  $0 < \epsilon \leq 1$  and  $0 < \eta \leq 1$  will lead to virus clearance if the clearance equilibrium in the presence of therapy,  $E_0^d = (K, 0, 0)$  (same as  $E_0$  in the absence of therapy), becomes the locally asymptotically stable steady state. This occurs when

$$\mathcal{R} = (1 - \epsilon)(1 - \eta)R_0 < 1. \tag{5}$$



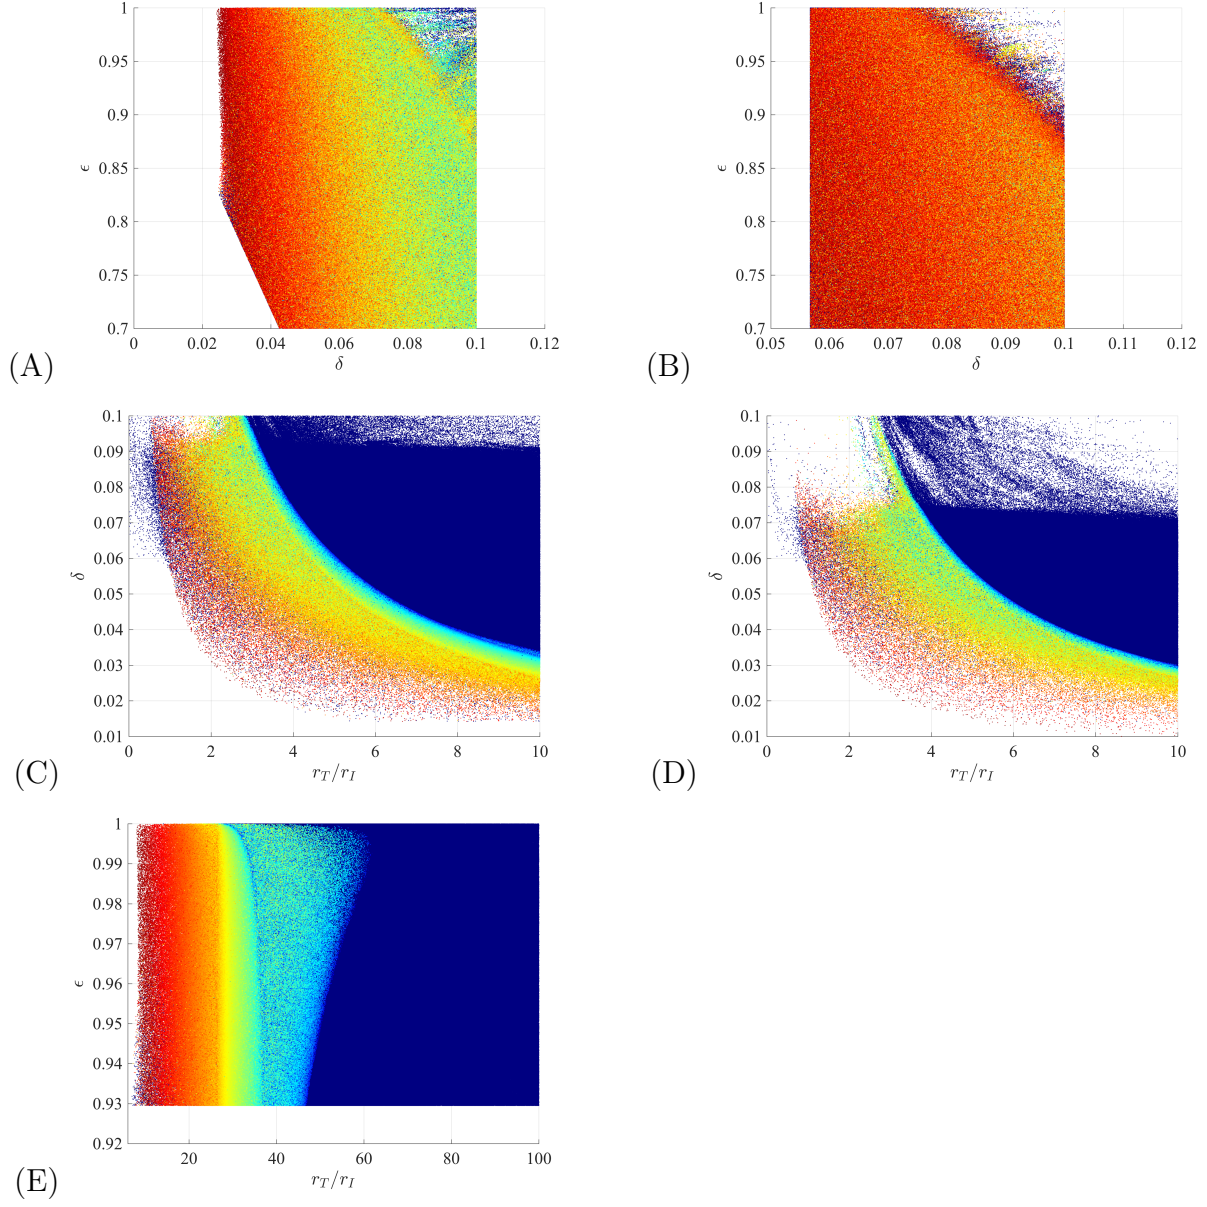

Figure S1: Samples for bi-phasic (dark blue dots) and tri-phasic (red to light blue dots)  $V(t)$  dynamics for: (A) fixed  $r_T/r_I = 2.5$ ; (B) fixed  $r_T/r_I = 1$ ; (C) fixed  $\epsilon = 0.9$ ; and (D) fixed  $\epsilon = 0.99$ ; (E) fixed  $\delta = 0.01$ . The other parameters are as in Table 2.

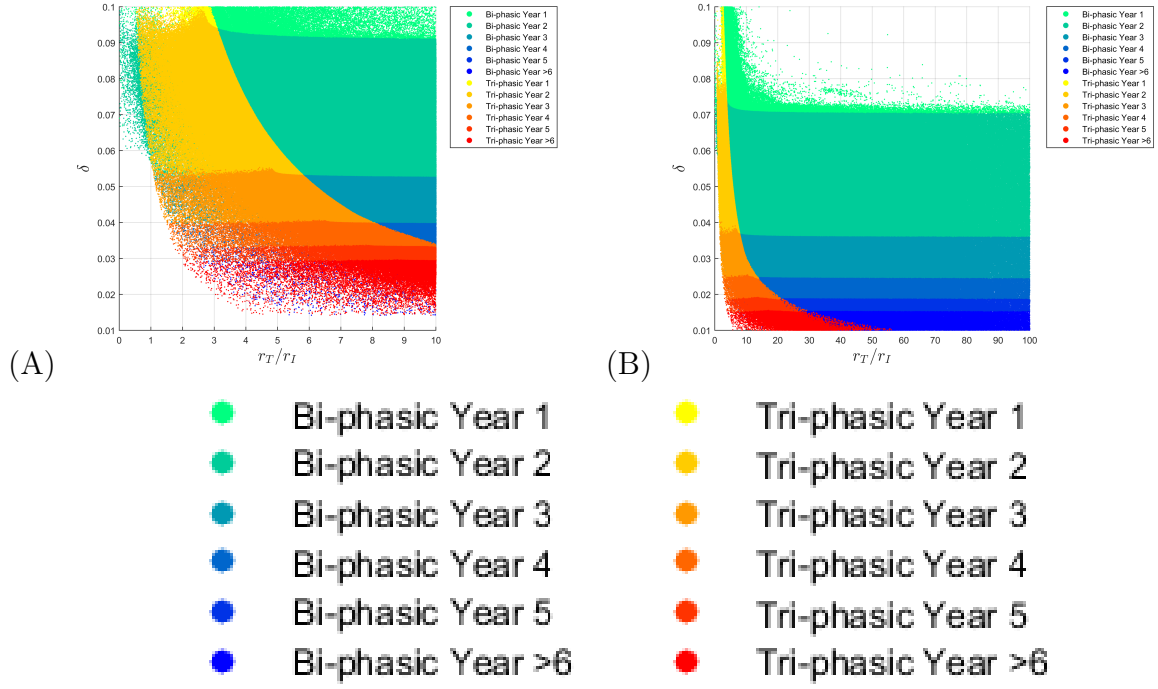

Figure S2: Division of the samples for bi-phasic and tri-phasic virus pattern based on the number of years to virus clearance for: (A) fixed  $\epsilon = 0.9$ ; (B) fixed  $\epsilon = 0.99$ . The other parameters are as in Table 2.

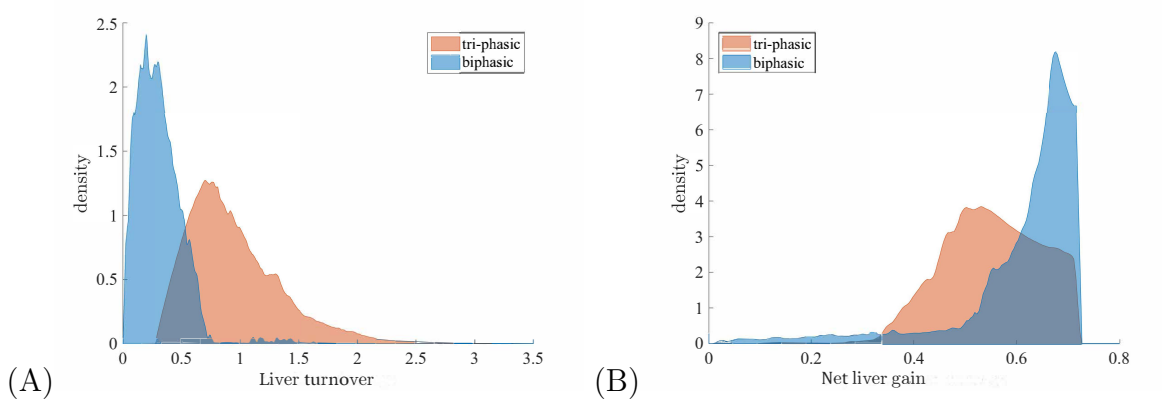

Figure S3: Density of bi-phasic (blue) and tri-phasic (pink)  $V(t)$  samples versus: (A) Liver turnover; (B) Net liver gain, for  $\epsilon = 0.99$ ,  $r_T/r_I = 2.5$ ,  $0.01 \leq \delta \leq 0.1 \text{ d}^{-1}$  and  $\tau = 100$  days.
